# Supplementary material for: Does Glass Size and Shape Influence Judgements of the Volume of Wine?
Source: PLoS One. 2015 Dec 23;10(12):e0144536. doi: 10.1371/journal.pone.0144536 (PMC4689536; doi:10.1371/journal.pone.0144536)
Supplement: S1 Text — (DOCX) [file pone.0144536.s002.docx]

**S1 Text. Calculation of Glass Capacity.**

Capacity was determined by assuming that the part of the glasses to be morphed is trapped in a cuboid and represents a given fraction of its volume. The volume of the morphed glasses, after modifying the width, height and depth dimensions of the cuboid, may be deduced by multiplying the fraction of the glass by the volume of the morphed cuboid. Let x0, y0 and z0 respectively denote the width, height and depth of the original cuboid, and let alpha denote the fraction of the volume of the wine in the cuboid. Then, the volume of wine in the original glass, v0, is given by: v0 = α x0 y0 z0; and the volume of wine in the morphed glass, vm, is given by: vm = α βxx0 βyy0 βzz0 = βx βy βz v0, where βxx0, βyy0 and βzz0 respectively denote the width, height and depth of the modified cuboid. As βx = βz, we finally have that vm = βx2 βy v0.
